# Supplementary material
Source: publisher site journal article supplement (https://www.dovepress.com/article/568965)
Supplement: Supplementary file 1 [file 568965%20Revised%20Supplementary%20materials_.pdf]

## SUPPLEMENTARY MATERIALS

### Supplementary Methods

**Supplementary Table 1. Additional Sources Assessed During the Review**

| Conference                 | Years                  |
|----------------------------|------------------------|
| ASH                        | 2019–2023              |
| EHA                        | 2020–2023 <sup>a</sup> |
| ISTH                       | 2020–2023 <sup>a</sup> |
| BIC <sup>b</sup>           | 2021 + 2023            |
| WFH <sup>b</sup>           | 2020 + 2023            |
| EAHAD                      | 2020–2023              |
| GTH <sup>b</sup>           | 2020                   |
| IHEA Annual                | 2019–2023              |
| ISPOR Europe               | 2020–2023              |
| ISPOR Annual               | 2020–2024              |
| HTAi <sup>b</sup> Annual   | 2020–2023              |
| <b>HTA bodies searched</b> |                        |
| NICE                       | Since inception        |
| CADTH                      | Since inception        |
| SMC                        | Since inception        |
| AWMSG                      | Since inception        |
| PBAC                       | Since inception        |
| HAS                        | Since inception        |
| IQWiG                      | Since inception        |
| INAHTA                     | Since inception        |
| ICER                       | Since inception        |

<sup>a</sup>Conference search years conducted for both original and update SLR on different dates; <sup>b</sup>The proceedings from the following conferences were either not published or not retrievable: BIC 2020, BIC 2022, WFH 2021, WFH 2022, GTH 2021, GTH 2022, and GTH 2023.

ASH, American Society of Hematology; AWMSG, All Wales Medicines Strategy Group; BIC, Bari International Conference; CADTH, Canadian Agency for Drugs and Technologies in Health; EAHAD, European Association for Haemophilia and Allied Disorders; EHA, European Haematology Association; GTH, German Haemostasis and Thrombosis Conference; HAS, Haute Autorité de Santé; HTAi, Health Technology Assessment International; ICER, Institute for Clinical and Economic Review; IHEA, International Health Economics Association; INAHTA, International Network of Agencies for Health Technology Assessment; IQWiG, Institut für Qualität und Wirtschaftlichkeit im Gesundheitswesen; ISPOR, International Society for Pharmacoeconomics and Outcomes Research; ISTH, International Society on Thrombosis and Haemostasis; NICE, National Institute for Health and Care Excellence; PBAC, Pharmaceutical Benefits Advisory Committee; SMC, Scottish Medicines Consortium; WFH, World Federation of Hemophilia.

**Supplementary Table 2. Full Study Eligibility Criteria and Rationale for Exclusion From Economic Evaluation Review**

| Category      | Inclusion criteria                                                                                                                                                                                                                                                                                                                              | Exclusion criteria                                                                                                                                                                                                                                                |
|---------------|-------------------------------------------------------------------------------------------------------------------------------------------------------------------------------------------------------------------------------------------------------------------------------------------------------------------------------------------------|-------------------------------------------------------------------------------------------------------------------------------------------------------------------------------------------------------------------------------------------------------------------|
| Population    | <ul style="list-style-type: none"> <li>• Patients of any age with cTTP, irrespective of their prior treatment status, including on-demand treatment for acute events or ongoing prophylactic treatment</li> <li>• Patients of any age with iTTP</li> <li>• Patients of any age with broad TTP without subgroup data for cTTP or iTTP</li> </ul> | <p>Healthy volunteers</p> <p>Diseases other than TTP</p>                                                                                                                                                                                                          |
| Study type    | <p>Full economic evaluations:</p> <ul style="list-style-type: none"> <li>• Cost-consequence</li> <li>• Cost-minimization</li> <li>• Cost-effectiveness</li> <li>• Cost-utility</li> <li>• Cost-benefit</li> <li>• Budget impact</li> <li>• SLRs and meta-analyses conducted on relevant populations<sup>a</sup></li> </ul>                      | <p>In vitro studies</p> <p>Preclinical studies or clinical studies reporting efficacy or safety information only</p> <p>Reviews, comments, letters, and editorials</p> <p>Case reports, case series</p> <p>Studies not reporting economic evaluation outcomes</p> |
| Interventions | <ul style="list-style-type: none"> <li>• No restrictions</li> <li>• All economic evaluations in the populations defined above were included in the review</li> </ul>                                                                                                                                                                            | None                                                                                                                                                                                                                                                              |
| Comparators   | No restrictions                                                                                                                                                                                                                                                                                                                                 | None                                                                                                                                                                                                                                                              |
| Outcomes      | <ul style="list-style-type: none"> <li>• Incremental costs</li> <li>• ICER/ICUR</li> <li>• Incremental QALYs/LYs</li> <li>• Model inputs (eg, transition probabilities)</li> <li>• Sensitivity analyses results</li> <li>• Type of model, time horizon, health states, cycle length, cost categories included, etc</li> </ul>                   | Studies not reporting outputs from economic evaluations                                                                                                                                                                                                           |
| Language      | English language only                                                                                                                                                                                                                                                                                                                           | Not applicable                                                                                                                                                                                                                                                    |
| Time limit    | <p>Original SLR: September 28, 2021</p> <p>Updated SLR: September 2021–January 16, 2024</p>                                                                                                                                                                                                                                                     | Not applicable                                                                                                                                                                                                                                                    |

| Category  | Inclusion criteria | Exclusion criteria |
|-----------|--------------------|--------------------|
| Countries | No limits          | Not applicable     |

cTTP, congenital thrombotic thrombocytopenic purpura; ICER, incremental cost-effectiveness ratio; ICUR, incremental cost utility ratio; iTTP, immune-mediated thrombotic thrombocytopenic purpura; LY, life year; QALY, quality-adjusted life year; SLR, systematic literature review; TTP, thrombotic thrombocytopenic purpura.

<sup>a</sup>SLRs were included for bibliography searches only.

**Supplementary Table 3. Full Study Eligibility Criteria and Rationale for Exclusion From HCRU and Cost Studies Review**

| Category      | Inclusion criteria                                                                                                                                                                                                                                                                                                                                                                                                 | Exclusion criteria                                                                                                                                                                                                                                                                                                |
|---------------|--------------------------------------------------------------------------------------------------------------------------------------------------------------------------------------------------------------------------------------------------------------------------------------------------------------------------------------------------------------------------------------------------------------------|-------------------------------------------------------------------------------------------------------------------------------------------------------------------------------------------------------------------------------------------------------------------------------------------------------------------|
| Population    | <ul style="list-style-type: none"> <li>Patients of any age with cTTP, irrespective of their prior treatment status, including on-demand treatment for acute events or ongoing prophylactic treatment<sup>a</sup></li> </ul>                                                                                                                                                                                        | <ul style="list-style-type: none"> <li>Healthy volunteers</li> <li>Diseases other than TTP</li> </ul>                                                                                                                                                                                                             |
| Study design  | <ul style="list-style-type: none"> <li>Cost and resource use studies:                             <ul style="list-style-type: none"> <li>Cost studies                                     <ul style="list-style-type: none"> <li>Resource use studies</li> <li>Economic evaluations reporting costs or resource use</li> </ul> </li> <li>SLRs conducted on relevant populations<sup>b</sup></li> </ul> </li> </ul> | <ul style="list-style-type: none"> <li>In vitro studies</li> <li>Preclinical studies or clinical studies reporting efficacy or safety information only</li> <li>Reviews, comments, letters, and editorials</li> <li>Case reports, case series</li> <li>Studies not reporting cost or resource use data</li> </ul> |
| Interventions | <ul style="list-style-type: none"> <li>No restrictions</li> </ul>                                                                                                                                                                                                                                                                                                                                                  | <ul style="list-style-type: none"> <li>None</li> </ul>                                                                                                                                                                                                                                                            |
| Comparators   | <ul style="list-style-type: none"> <li>No restrictions</li> </ul>                                                                                                                                                                                                                                                                                                                                                  | <ul style="list-style-type: none"> <li>None</li> </ul>                                                                                                                                                                                                                                                            |
| Outcomes      | <ul style="list-style-type: none"> <li>Resource use data</li> <li>Cost data: Direct (medical/non-medical), indirect cost, drug acquisition cost, administration cost, treatment cost, adverse event cost, health state related costs, terminal care costs etc</li> <li>Productivity losses (presenteeism, absenteeism)</li> <li>Supportive care medication use</li> </ul>                                          | <ul style="list-style-type: none"> <li>Studies not reporting cost and resource use data</li> </ul>                                                                                                                                                                                                                |
| Language      | <ul style="list-style-type: none"> <li>English only</li> </ul>                                                                                                                                                                                                                                                                                                                                                     | <ul style="list-style-type: none"> <li>Not applicable</li> </ul>                                                                                                                                                                                                                                                  |
| Time limit    | <ul style="list-style-type: none"> <li>Original SLR: September 28, 2021</li> <li>Updated SLR: September 2021–January 16, 2024</li> </ul>                                                                                                                                                                                                                                                                           | <ul style="list-style-type: none"> <li>Not applicable</li> </ul>                                                                                                                                                                                                                                                  |
| Country       | <ul style="list-style-type: none"> <li>No limit</li> </ul>                                                                                                                                                                                                                                                                                                                                                         | <ul style="list-style-type: none"> <li>Not applicable</li> </ul>                                                                                                                                                                                                                                                  |

<sup>a</sup>Studies reporting HCRU and cost data for patients with cTTP were included, even if these studies also reported data for patients with iTTP, or TTP of unspecified subtype. However, for the HCRU and cost studies review—which focused solely on cTTP—only data for patients with cTTP were extracted. <sup>b</sup>Systematic reviews conducted in the last 3 years were included for bibliography searches only.

cTTP, congenital thrombotic thrombocytopenic purpura; HCRU, healthcare resource use; iTTP, immune-mediated thrombotic thrombocytopenic purpura; SLR, systematic literature review; TTP, thrombotic thrombocytopenic purpura.

**Supplementary Table 4. Full Study Eligibility Criteria and Rationale for Exclusion From Utility and HRQoL Review**

| Category      | Inclusion criteria                                                                                                                                                                                                                                                                                                                                                                                                                                                                                                         | Exclusion criteria                                                                                                                                                                                                                                                 |
|---------------|----------------------------------------------------------------------------------------------------------------------------------------------------------------------------------------------------------------------------------------------------------------------------------------------------------------------------------------------------------------------------------------------------------------------------------------------------------------------------------------------------------------------------|--------------------------------------------------------------------------------------------------------------------------------------------------------------------------------------------------------------------------------------------------------------------|
| Population    | <ul style="list-style-type: none"> <li>• Patients of any age with cTTP, irrespective of their prior treatment status, including on-demand treatment for acute events or ongoing prophylactic treatment</li> <li>• Patients of any age with broad TTP without subgroup data for cTTP or iTTP</li> <li>• Patients of any age with iTTP</li> <li>• Carers for patients with any of the conditions above</li> </ul>                                                                                                            | <ul style="list-style-type: none"> <li>• Healthy volunteers</li> <li>• Diseases other than TTP</li> </ul>                                                                                                                                                          |
| Study design  | <ul style="list-style-type: none"> <li>• Studies reporting HRQoL and/or utility/disutility data (regardless of treatment)</li> <li>• Systematic reviews and meta-analysis conducted on relevant population<sup>a</sup></li> </ul>                                                                                                                                                                                                                                                                                          | <ul style="list-style-type: none"> <li>• In vitro studies</li> <li>• Preclinical studies</li> <li>• Reviews, comments, letters, and editorials</li> <li>• Case reports, case series</li> <li>• Clinical studies reporting only efficacy and safety data</li> </ul> |
| Interventions | No restrictions                                                                                                                                                                                                                                                                                                                                                                                                                                                                                                            | None                                                                                                                                                                                                                                                               |
| Comparators   | No restrictions                                                                                                                                                                                                                                                                                                                                                                                                                                                                                                            | None                                                                                                                                                                                                                                                               |
| Outcomes      | <ul style="list-style-type: none"> <li>• All types of utilities or disutilities data including but not limited to EQ-5D<sup>®</sup>, SF-6D, Health Utility Index, Assessment of Quality of Life</li> <li>• Studies reporting mapped utilities values from disease-specific instruments</li> <li>• HRQoL outcomes reported using: <ul style="list-style-type: none"> <li>○ SF-36 (and others like SF-12)</li> <li>○ EQ-5D</li> <li>○ EQ-5D-Y</li> <li>○ PedsQL</li> <li>○ TSQM-9</li> <li>○ cTTP-PEQ</li> </ul> </li> </ul> | Studies not reporting utility values                                                                                                                                                                                                                               |
| Language      | English only                                                                                                                                                                                                                                                                                                                                                                                                                                                                                                               | Non-English                                                                                                                                                                                                                                                        |

| <b>Category</b> | <b>Inclusion criteria</b>                                                        | <b>Exclusion criteria</b> |
|-----------------|----------------------------------------------------------------------------------|---------------------------|
| Time limit      | Original SLR: September 28, 2021<br>Updated SLR: September 2021–January 16, 2024 | None                      |
| Country         | No limit                                                                         | None                      |

<sup>a</sup>SLRs conducted in the last 3 years were included for bibliography searches only.

cTTP, congenital thrombotic thrombocytopenic purpura; cTTP-PEQ, congenital thrombotic thrombocytopenic purpura–patient experience questionnaire; EQ-5D, EuroQol-5-Dimension; EQ-5D-Y, The Youth version of EuroQol-5 dimension; HRQoL, Health-Related Quality of Life; iTTP, immune-mediated thrombotic thrombocytopenic purpura; PedsQL, Pediatric Quality of Life Inventory; SLR; systematic literature review; SF-36, 36-Item Short Form Survey; SF-6D, Short-Form 6 Dimensions; SF-12, 12-Item Short Form Survey; TSQM-9, Treatment Satisfaction Questionnaire for Medication - 9 Items.

**Supplementary Table 5.** Key Characteristics of Included Economic Evaluation Studies

| Study     | Type of TTP | Study country | Model details                                                                                                           | Time horizon                                                       | Perspective                                          | Cost year(s) | Currency            | Cycle length                         | Discount rate for cost and benefits (per annum)                    | Willingness-to-pay threshold |
|-----------|-------------|---------------|-------------------------------------------------------------------------------------------------------------------------|--------------------------------------------------------------------|------------------------------------------------------|--------------|---------------------|--------------------------------------|--------------------------------------------------------------------|------------------------------|
| NICE 2020 | iTTP        | UK            | Decision tree model for the acute iTTP episode followed by Markov model for patients in remission and following relapse | Decision tree model: 3 months<br>Markov model: lifetime (55 years) | National Health Service and personal social services | 2017–18      | Pounds Sterling (£) | Markov model <sup>a</sup> : 3 months | 3.5% and an alternate discount rate of 1.5% also used for outcomes | NR                           |
| SMC 2020  | iTTP        | Scotland      | Decision tree model for the acute episode while a cohort-level Markov model used to model iTTP in remission.            | 55 years                                                           | Healthcare system                                    | NR           | Pounds Sterling (£) | Markov model: 3 months               | NR                                                                 | NR                           |

| Study         | Type of TTP | Study country | Model details                          | Time horizon             | Perspective                       | Cost year(s) | Currency              | Cycle length                       | Discount rate for cost and benefits (per annum) | Willingness-to-pay threshold |
|---------------|-------------|---------------|----------------------------------------|--------------------------|-----------------------------------|--------------|-----------------------|------------------------------------|-------------------------------------------------|------------------------------|
| CADTH 2023    | iTTP        | Canada        | Decision tree followed by Markov model | Lifetime (53 years)      | Canadian public health care payer | NR           | Canadian dollars (\$) | 3 months                           | 1.5% per cycle                                  | \$50,000                     |
| Di Minno 2020 | iTTP        | Italy         | Markov model                           | Lifetime (60 years)      | Italian healthcare                | NR           | Euros (€)             | NR                                 | 3.5%                                            | NR                           |
| Di Minno 2021 | iTTP        | Italy         | Markov model                           | Lifetime                 | Healthcare                        | 2020         | Euros (€)             | 3 months                           | 3%                                              | €60,000                      |
| Goshua 2021   | iTTP        | USA           | Markov model<br>Decision tree model    | Markov model:<br>5 years | Health system                     | 2019         | US dollars (\$)       | Markov model: 12 months (5 cycles) | 3%                                              | \$195,330                    |
| Butt 2022     | iTTP        | USA           | Markov model                           | At least 1 year          | US healthcare                     | NR           | US dollars (\$)       | NR                                 | NR                                              | \$195,300                    |

| Study         | Type of TTP | Study country | Model details                       | Time horizon                                                       | Perspective   | Cost year(s) | Currency        | Cycle length | Discount rate for cost and benefits (per annum) | Willingness-to-pay threshold |
|---------------|-------------|---------------|-------------------------------------|--------------------------------------------------------------------|---------------|--------------|-----------------|--------------|-------------------------------------------------|------------------------------|
| Sullivan 2023 | iTTP        | USA           | Markov model<br>Decision tree model | Markov model: lifetime (55 years)<br>Decision tree model: 3 months | US healthcare | 2022         | US dollars (\$) | 3 months     | 3%                                              | \$150,000 to \$200,000       |

<sup>a</sup>Half-cycle correction is also applied.

CADTH, Canadian Agency for Drugs and Technologies; HTA, health technology assessment; iTTP, immune thrombocytopenic purpura; NICE, National Institute for Health and Care Excellence; NR, not reported; SMC, Scottish Medicines Consortium.
